# Supplementary material
Source: HighWire-hosted journal article supplement (https://bmjopenquality.bmj.com/highwire/filestream/142224/field_highwire_adjunct_files/0/bmjoq-2020-001335supp001_data_supplement.pdf)

## Supplementary materials

1. Supplementary Table – 1: Adjusted odds ratio of predictors of ‘door to antibiotics time  $\leq$  60 minutes’
2. Supplementary Table – 2: Adjusted odds ratio of predictors of ‘Collection of blood culture’
3. Supplement Figure – 1: Fish bone analysis
4. Supplement Figure – 2: Sepsis screening tool

## Supplementary Table – 1: Adjusted odds ratio of predictors of ‘door to antibiotics time $\leq$ 60 minutes’

| Characteristics                | LCI  | OR   | UCI   | p-value |
|--------------------------------|------|------|-------|---------|
| Age                            | 0.98 | 1.00 | 1.02  | 0.76    |
| Gender                         | 0.58 | 1.22 | 2.56  | 0.60    |
| Triaged as Red                 | 0.23 | 1.30 | 7.37  | 0.77    |
| Sepsis Screening tool applied  | 1.74 | 4.41 | 11.16 | 0.00    |
| Heart rate                     | 0.98 | 0.99 | 1.01  | 0.47    |
| Systolic blood pressure        | 0.99 | 1.00 | 1.01  | 0.83    |
| Oxygen saturation              | 0.97 | 1.00 | 1.04  | 0.81    |
| Respiratory rate               | 0.95 | 1.02 | 1.09  | 0.58    |
| GCS score                      | 1.02 | 1.2  | 1.42  | 0.03    |
| Fever                          | 1.36 | 3.03 | 6.73  | 0.01    |
| Altered sensorium              | 1.23 | 4.55 | 16.82 | 0.02    |
| Cough                          | 0.41 | 1.23 | 3.69  | 0.71    |
| Shortness of breath            | 0.25 | 0.70 | 1.97  | 0.50    |
| Jaundice                       | 0.15 | 0.70 | 3.23  | 0.65    |
| Pain abdomen                   | 0.27 | 0.69 | 1.76  | 0.44    |
| Dysuria                        | 0.01 | 0.12 | 1.27  | 0.08    |
| Loose stools                   | 0.13 | 0.43 | 1.38  | 0.15    |
| Skin and soft tissue infection | 0.06 | 0.35 | 1.92  | 0.23    |
| Presence of any comorbidity    | 0.29 | 0.63 | 1.36  | 0.24    |
| Intervention phase*            | 0.21 | 0.74 | 2.64  | 0.64    |
| Post-intervention phase*       | 1.59 | 4.75 | 14.16 | 0.01    |

## Supplementary Table – 2: Adjusted odds ratio of predictors of ‘Collection of blood culture’

|                                   | Sig. | aOR     | 95% C.I. for aOR |          |
|-----------------------------------|------|---------|------------------|----------|
|                                   |      |         | Lower            | Upper    |
| Age                               | .551 | .991    | .963             | 1.020    |
| Sex(1)                            | .893 | .938    | .366             | 2.401    |
| Triage(1)                         | .026 | 10.824  | 1.325            | 88.427   |
| SepsisScreeningtoolapplied(1)     | .000 | 71.920  | 13.292           | 389.132  |
| HR                                | .371 | 1.009   | .989             | 1.029    |
| SBP                               | .361 | 1.008   | .991             | 1.026    |
| SpO2                              | .330 | 1.019   | .981             | 1.060    |
| RR                                | .216 | .944    | .862             | 1.034    |
| GCS                               | .505 | .918    | .714             | 1.181    |
| Fever(1)                          | .082 | 3.068   | .867             | 10.847   |
| Altered sensorium(1)              | .220 | .368    | .074             | 1.818    |
| Cough(1)                          | .585 | 1.476   | .365             | 5.967    |
| Shortness of breath(1)            | .820 | 1.159   | .326             | 4.117    |
| Jaundice(1)                       | .138 | .171    | .017             | 1.759    |
| Pain abdomen(1)                   | .927 | .945    | .281             | 3.182    |
| Dysuria(1)                        | .087 | .135    | .013             | 1.343    |
| Loose stools(1)                   | .588 | .647    | .134             | 3.121    |
| Skin and soft tissue infection(1) | .001 | .024    | .002             | .231     |
| comorbidity_present(1)            | .522 | 1.409   | .493             | 4.027    |
| Intervention_phase(1)             | .000 | 346.577 | 52.898           | 2270.689 |

### Supplement Figure – 1: Fish bone analysis

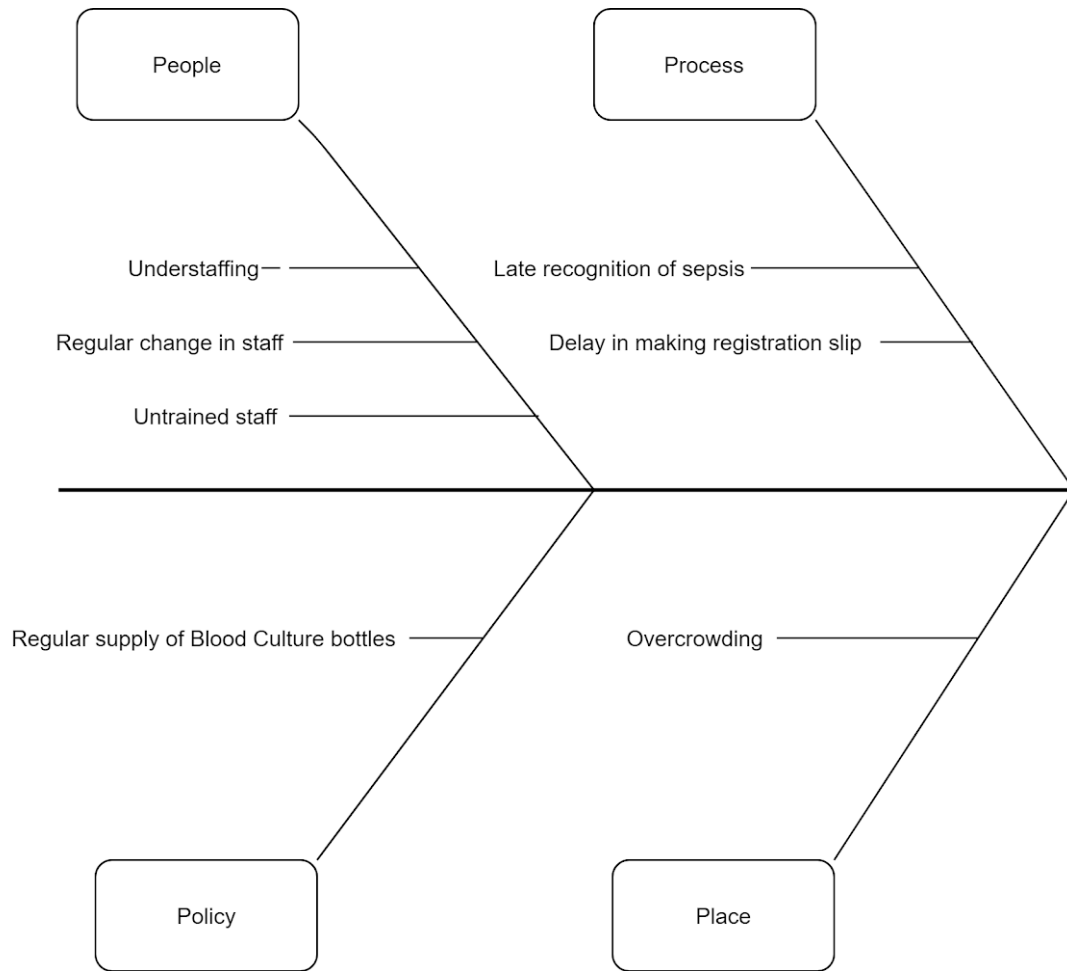

## Supplement Figure – 2: Sepsis screening tool

### WORKUP AND FLOW CHART

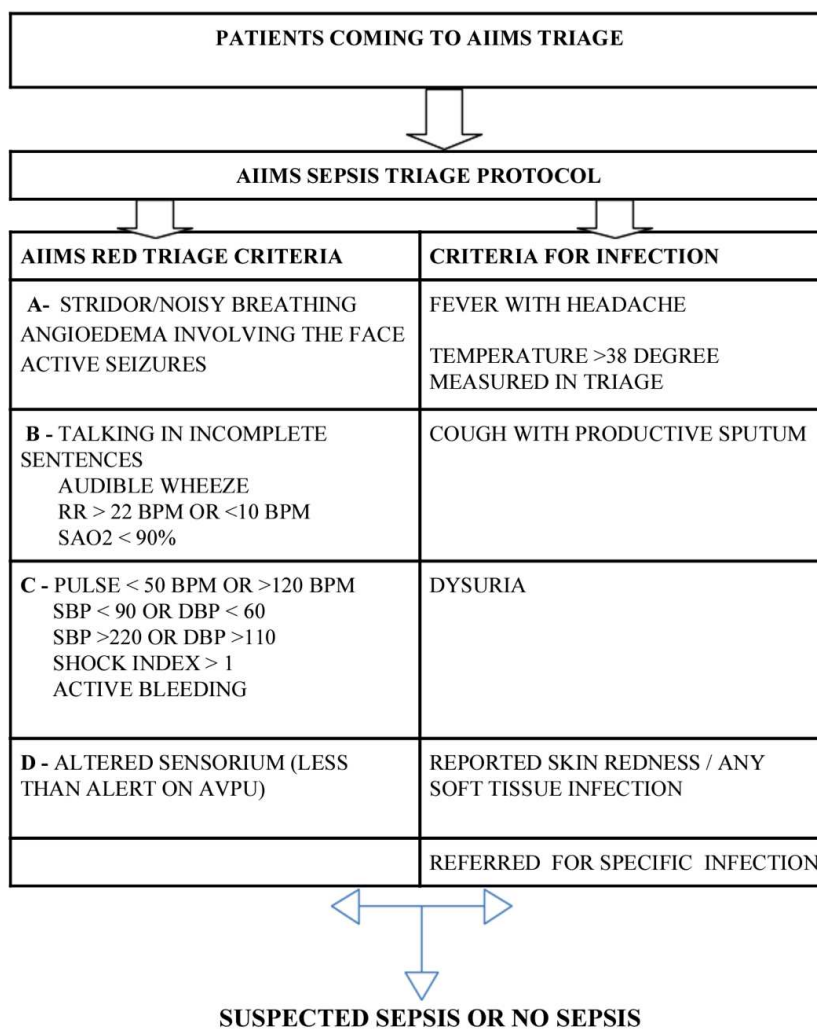

Supplement: bmjoq-2020-001335supp001_data_supplement.pdf [file bmjoq-2020-001335supp001_data_supplement.pdf]
